# Supplementary material for: Molecular based, chimie douce approach to 0D and 1D indium oxide nanostructures. Evaluation of their sensing properties towards CO and H2
Source: Royal Society of Chemistry journal article supplement (doi:10.1039/c0jm01490g), 2010-01-01
Supplement: c0jm01490g.pdf [file c0jm01490g.pdf]

## Supporting Information

### Molecular based, chimie douce approach to 0D and 1D indium oxide nano-structures. Evaluation of their sensing properties towards CO and H<sub>2</sub>

Mikhail Pashchanka, Rudolf C. Hoffmann, Aleksander Gurlo *and* Jörg J. Schneider\*

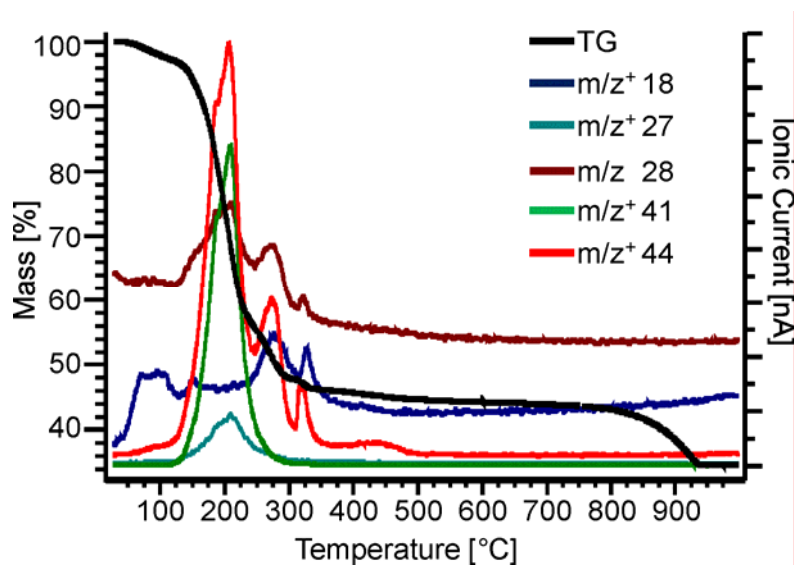

**Figure 1.** TG-coupled MS of Tris[2-(methoxyimino)propanoato]indium in oxygen.

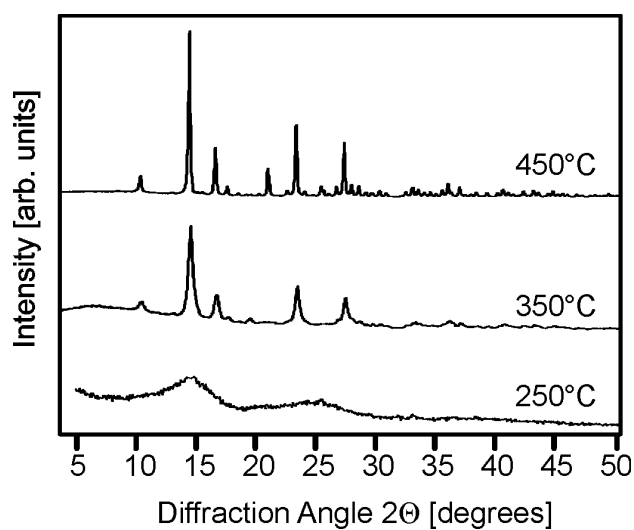

**Figure 2.** XRD patterns of the decomposition of precursor (**1**) calcined at various temperatures for 30 minutes in air

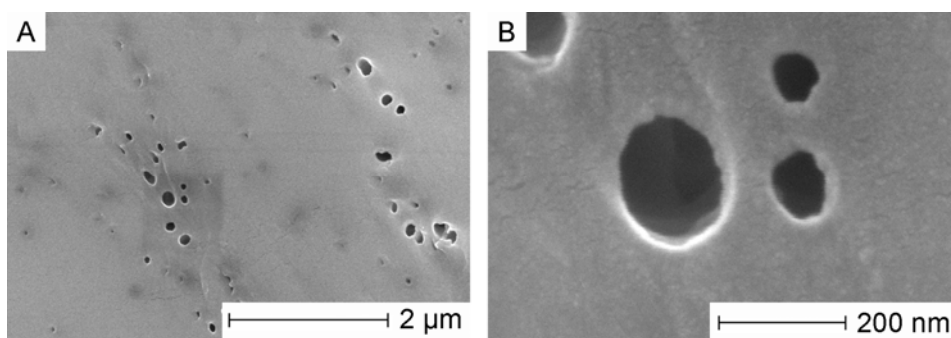

**Figure 3.** SEM pictures of the surface of Whatman Nuclepore® filters, nominal pore size 0.1  $\mu\text{m}$ .

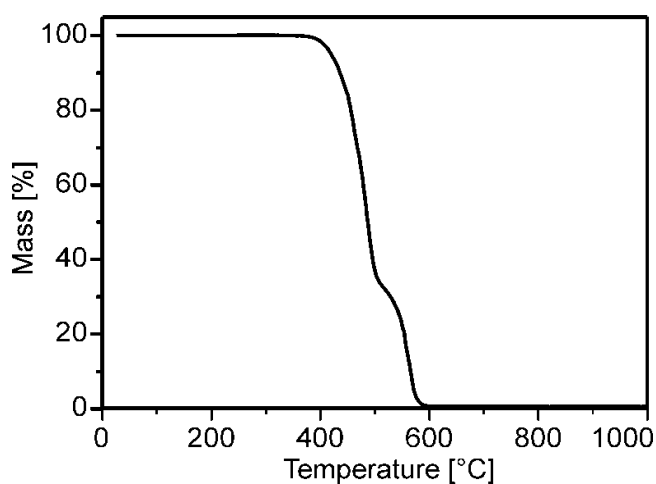

**Figure 4.** TG curve of Whatman Nuclepore template with nominal pore size 0.1  $\mu\text{m}$  analysed in oxidizing atmosphere
